# Supplementary material for: Comparison of iRECIST versus RECIST V.1.1 in patients treated with an anti-PD-1 or PD-L1 antibody: pooled FDA analysis
Source: PubMed Central journal article supplement — J Immunother Cancer. 2020 Feb 26;8(1):e000146. doi: 10.1136/jitc-2019-000146 (PMC7057528; doi:10.1136/jitc-2019-000146), 2020-02-26

Supplemental Table 1: Comparison of RECISTv1.1, irRC, irRECIST, imRECIST and iRECIST

|                             | <b>RECISTv1.1</b><br>(Eisenhauer et al., 2009)                                                                                                    | <b>irRC</b><br>(Wolchok et al., 2009)                                                                                                                                                                                                           | <b>irRECIST</b><br>(Bohnsack et al., 2013-2014)                                                                                                                                     | <b>imRECIST</b><br>(Hodi et al., 2018)                                                                                                                                                                                                      | <b>iRECIST</b><br>(Seymour et al., 2017)                                                                                                                                                                             |
|-----------------------------|---------------------------------------------------------------------------------------------------------------------------------------------------|-------------------------------------------------------------------------------------------------------------------------------------------------------------------------------------------------------------------------------------------------|-------------------------------------------------------------------------------------------------------------------------------------------------------------------------------------|---------------------------------------------------------------------------------------------------------------------------------------------------------------------------------------------------------------------------------------------|----------------------------------------------------------------------------------------------------------------------------------------------------------------------------------------------------------------------|
| <b>Target Tumor</b>         | <ul style="list-style-type: none"> <li>• 5 lesions/2 per organ max</li> <li>• Sum of longest diameters (SLD)</li> <li>• unidimensional</li> </ul> | <ul style="list-style-type: none"> <li>• 10 (5 lesions per organ: 10 visceral, 5 cutaneous max)</li> <li>• Sum of product of two largest perpendicular diameters (SPD)</li> <li>• bidimensional</li> </ul>                                      | <ul style="list-style-type: none"> <li>• 5 lesions/2 per organ max</li> <li>• SLD</li> <li>• unidimensional</li> </ul>                                                              | <ul style="list-style-type: none"> <li>• 5 lesions/2 per organ max</li> <li>• SLD</li> <li>• unidimensional</li> </ul>                                                                                                                      | <ul style="list-style-type: none"> <li>• 5 lesions/2 per organ max</li> <li>• SLD</li> <li>• unidimensional</li> </ul>                                                                                               |
| <b>Non-Target lesion(s)</b> | <ul style="list-style-type: none"> <li>• contributes to CR/PD status</li> </ul>                                                                   | <ul style="list-style-type: none"> <li>• contributes to defining irCR when absent</li> </ul>                                                                                                                                                    | <ul style="list-style-type: none"> <li>• contributes to irCR/irPD status</li> </ul>                                                                                                 | <ul style="list-style-type: none"> <li>• contributes to defining CR when absent</li> </ul>                                                                                                                                                  | <ul style="list-style-type: none"> <li>• contributes to iCR/iUPD status</li> </ul>                                                                                                                                   |
| <b>New Lesion(s)</b>        | <ul style="list-style-type: none"> <li>• Denotes PD</li> <li>• Not added to tumor burden</li> </ul>                                               | <ul style="list-style-type: none"> <li>• Does not define irPD</li> <li>• Measurable(<math>\geq 5 \times 5 \text{mm}</math>): Added to tumor burden</li> <li>• Non-Measurable(<math>&lt; 5 \times 5 \text{mm}</math>): precludes irCR</li> </ul> | <ul style="list-style-type: none"> <li>• Does not define irPD</li> <li>• Measurable: Added to tumor burden</li> <li>• Non-Measurable: precludes irCR/contributes to irPD</li> </ul> | <ul style="list-style-type: none"> <li>• Does not define PD</li> <li>• Measurable(<math>\geq 5 \times 5 \text{mm}</math>): Added to tumor burden</li> <li>• Non-Measurable(<math>&lt; 5 \times 5 \text{mm}</math>): precludes CR</li> </ul> | <ul style="list-style-type: none"> <li>• Denotes iUPD</li> <li>• Not added to tumor burden</li> <li>• Target new: 5 lesions/2 per organ max, obtain measurement</li> <li>• Non-Target new: non-measurable</li> </ul> |

|                    |                                                                                                                                                                                                                                                                                                                                                                                                                |                                                                                                                                                                                                   |                                                                                                                                                                                                                                                                                                                                                                                                                                                                                                   |                                                                                                                                                                                                                                                                                   |                                                                                                                                                                                                                                                                                                                                                                                                                                                                                                                                                                                                                                                                                                |
|--------------------|----------------------------------------------------------------------------------------------------------------------------------------------------------------------------------------------------------------------------------------------------------------------------------------------------------------------------------------------------------------------------------------------------------------|---------------------------------------------------------------------------------------------------------------------------------------------------------------------------------------------------|---------------------------------------------------------------------------------------------------------------------------------------------------------------------------------------------------------------------------------------------------------------------------------------------------------------------------------------------------------------------------------------------------------------------------------------------------------------------------------------------------|-----------------------------------------------------------------------------------------------------------------------------------------------------------------------------------------------------------------------------------------------------------------------------------|------------------------------------------------------------------------------------------------------------------------------------------------------------------------------------------------------------------------------------------------------------------------------------------------------------------------------------------------------------------------------------------------------------------------------------------------------------------------------------------------------------------------------------------------------------------------------------------------------------------------------------------------------------------------------------------------|
| <b>Progression</b> | <ul style="list-style-type: none"> <li>• <math>\geq 20\%</math> increase in SLD from nadir + 5mm absolute increase</li> </ul> <p>and/or</p> <ul style="list-style-type: none"> <li>• presence of new lesion</li> </ul> <p>and/or</p> <ul style="list-style-type: none"> <li>• unequivocal PD in non-target lesion</li> </ul> <ul style="list-style-type: none"> <li>• Does not require confirmation</li> </ul> | <ul style="list-style-type: none"> <li>• <math>\geq 25\%</math> increase in SPD from nadir</li> </ul> <ul style="list-style-type: none"> <li>• Requires confirmation &gt;4 weeks apart</li> </ul> | <ul style="list-style-type: none"> <li>• <math>\geq 20\%</math> increase in SLD from nadir + 5mm absolute increase</li> </ul> <p>and/or</p> <ul style="list-style-type: none"> <li>• Unequivocal PD for non-target or new non-measurable lesions</li> </ul> <ul style="list-style-type: none"> <li>• Recommends confirmation &gt;4 weeks after initial irPD assessment (particularly for those with minimal % increase above 20% threshold and during the first 12 weeks of treatment)</li> </ul> | <ul style="list-style-type: none"> <li>• <math>\geq 20\%</math> increase in SLD from nadir</li> </ul> <ul style="list-style-type: none"> <li>• Negated by subsequent non-PD assessment <math>\geq 4</math> weeks from the date first documented (lack of confirmation)</li> </ul> | <ul style="list-style-type: none"> <li>• <math>\geq 20\%</math> increase in SLD from nadir + 5mm absolute increase</li> </ul> <p>and/or</p> <ul style="list-style-type: none"> <li>• presence of new lesion</li> </ul> <p>and/or</p> <ul style="list-style-type: none"> <li>• unequivocal PD in non-target lesion</li> </ul> <ul style="list-style-type: none"> <li>• requires confirmation 4-8 weeks from original assessment, where confirmation is obtained either by additional increase (<math>\geq 5</math> mm for target or measurable new lesions, any increase for non-target or an additional number of new lesions) in the original category or iUPD in another category</li> </ul> |
|--------------------|----------------------------------------------------------------------------------------------------------------------------------------------------------------------------------------------------------------------------------------------------------------------------------------------------------------------------------------------------------------------------------------------------------------|---------------------------------------------------------------------------------------------------------------------------------------------------------------------------------------------------|---------------------------------------------------------------------------------------------------------------------------------------------------------------------------------------------------------------------------------------------------------------------------------------------------------------------------------------------------------------------------------------------------------------------------------------------------------------------------------------------------|-----------------------------------------------------------------------------------------------------------------------------------------------------------------------------------------------------------------------------------------------------------------------------------|------------------------------------------------------------------------------------------------------------------------------------------------------------------------------------------------------------------------------------------------------------------------------------------------------------------------------------------------------------------------------------------------------------------------------------------------------------------------------------------------------------------------------------------------------------------------------------------------------------------------------------------------------------------------------------------------|

Abbreviations: SLD: Sum of longest diameter; SPD: Sum of product of two largest perpendicular diameters; PD/irPD/iUPD: progressive disease; CR/irCR: complete response

Supplemental Table 2: iRECIST and RECIST criteria for tumor response

| Response Category | Criteria                                                                                                                                                                                                                                                                                                                                                                                    | FDA approach to retrospective analysis of data                                                                                                                                                                                                                                                 |
|-------------------|---------------------------------------------------------------------------------------------------------------------------------------------------------------------------------------------------------------------------------------------------------------------------------------------------------------------------------------------------------------------------------------------|------------------------------------------------------------------------------------------------------------------------------------------------------------------------------------------------------------------------------------------------------------------------------------------------|
| iRECIST/RECIST    |                                                                                                                                                                                                                                                                                                                                                                                             |                                                                                                                                                                                                                                                                                                |
| iCR / CR          | <ul style="list-style-type: none"> <li>Disappearance of all non-target lesions</li> <li>Normalization of tumor marker level</li> <li>Lymph nodes &lt;10 mm short axis</li> </ul>                                                                                                                                                                                                            | Followed per RECISTv1.1 and iRECIST criteria                                                                                                                                                                                                                                                   |
| iPR / PR          | ≥30% decrease in target SLD, taking baseline sum as reference                                                                                                                                                                                                                                                                                                                               | Followed per RECISTv1.1 and iRECIST criteria                                                                                                                                                                                                                                                   |
| iSD / SD          | Neither sufficient shrinkage to qualify for PR nor sufficient increase to qualify for PD                                                                                                                                                                                                                                                                                                    | Followed per RECISTv1.1 and iRECIST criteria                                                                                                                                                                                                                                                   |
| iUPD / PD         | <ul style="list-style-type: none"> <li>≥20% increase in target SLD, taking nadir sum as reference + an absolute increase ≥ 5 mm</li> <li>The appearance of one or more new lesions</li> <li>Unequivocal progression in non-target lesion</li> </ul>                                                                                                                                         | 1 <sup>st</sup> date of PD used as PFS date<br><br>1 <sup>st</sup> date of iUPD used as iPFS date if: <ul style="list-style-type: none"> <li>It was the last assessment <u>or</u></li> <li>Followed by a confirmation of PD <u>or</u></li> <li>All successive assessments were iUPD</li> </ul> |
| iCPD              | Confirmation 4-8 weeks from original assessment with: <ul style="list-style-type: none"> <li>Additional increase in tumor burden (i.e., ≥5 mm increase in target lesions or measurable new lesions, or any increase for non-target lesions) <u>or</u></li> <li>Additional new lesions if the preceding iUPD was based on new lesions <u>or</u></li> <li>iUPD in another category</li> </ul> | Two consecutive, non-target evaluations indicating worsening, increasing or unequivocal PD were considered confirmation, as actual measurements were not recorded to determine if there was an increase from the previous assessment                                                           |
| NE                | For each timepoint assessment: <ul style="list-style-type: none"> <li>If no imaging/measurement is done at all</li> <li>If a subset of lesion measurements is taken (and criteria for progression is not already met with the subset)</li> </ul>                                                                                                                                            | Followed per RECISTv1.1 and iRECIST criteria                                                                                                                                                                                                                                                   |

Abbreviations: iCPD: confirmed progressive disease; iCR/CR: complete response; iPR/PR: partial response; iSD/SD: Stable disease; iUPD: unconfirmed progressive disease; NE: not evaluable; PD: progression; SLD: Sum of longest diameter

Supplemental Figure 1: Duration of response by iRECIST and RECIST among n=138 responders with iSD or better post RECISTv1.1 PD.

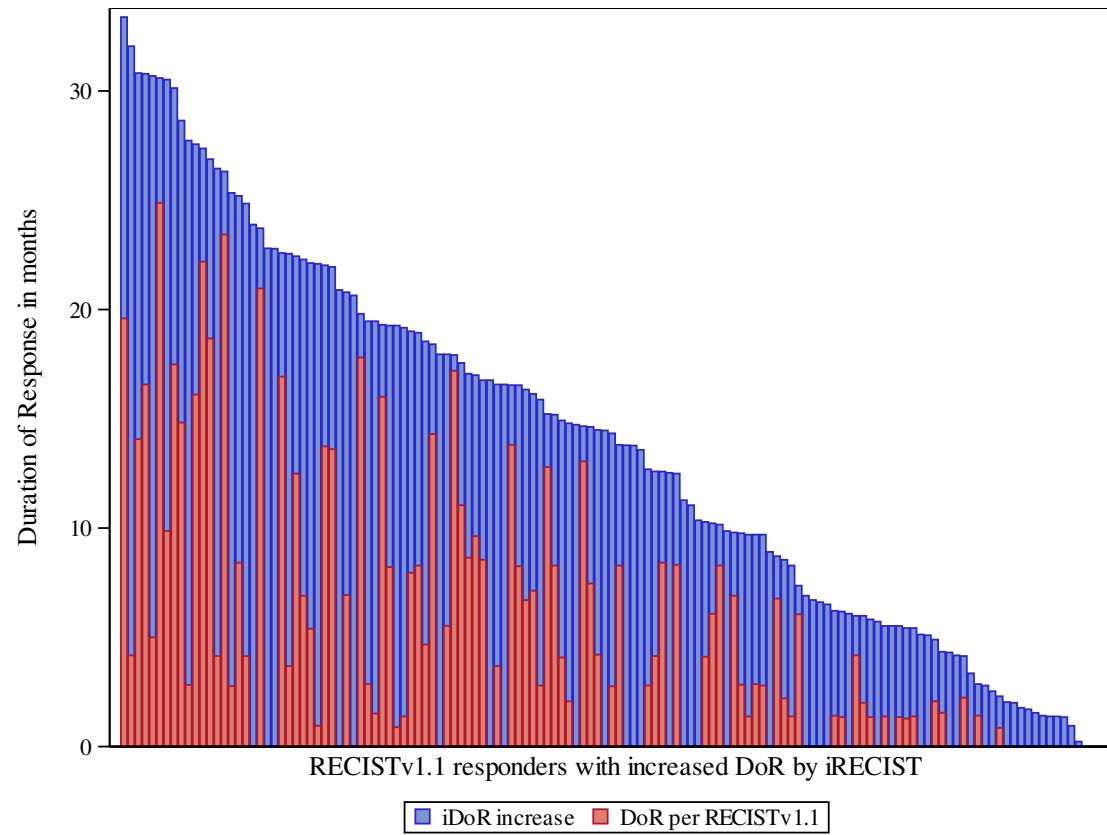

Supplemental Figure 2: OS by (a) iPFS and (b) PFS on the log scale

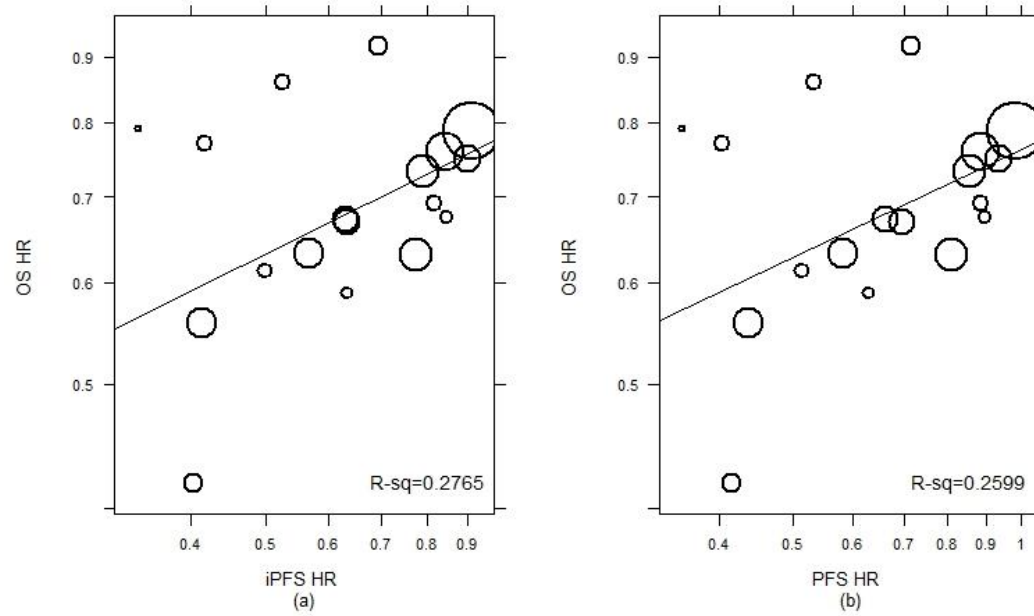

Supplement: jitc-2019-000146supp001.pdf [file jitc-2019-000146supp001.pdf]
